# Supplementary material for: Construction of stimuli-responsive supramolecular gel via bispillar[5]arene-based multiple interactions
Source: Royal Society of Chemistry journal article supplement (doi:10.1039/c7py00335h), 2017-01-01
Supplement: c7py00335h1.pdf [file c7py00335h1.pdf]

## Supporting Information

### **Construction of stimuli-responsive supramolecular gel via bispillar[5]arene-based multiple interactions**

Tai-Bao Wei\*, Jin-Fa Chen, Xiao-Bin Cheng, Hui Li, Bing-Bing Han, Hong Yao, You-Ming Zhang and Qi Lin\*

*Key Laboratory of Eco-Environment-Related Polymer Materials, Ministry of Education of China; Key Laboratory of Polymer Materials of Gansu Province; College of Chemistry and Chemical Engineering, Northwest Normal University, Lanzhou, Gansu, 730070, P. R. China*

## 1. Materials and methods

1,4-Dimethoxybenzene, boron trifluoride ethyl ether complex, 1,6-dibromohexane, and 1,10-dibromodecane were reagent grade and used as received. Solvents were either employed as purchased or dried by  $\text{CaCl}_2$ .  $^1\text{H}$  NMR spectra were recorded on a Mercury-600BB spectrometer at 600 MHz and  $^{13}\text{C}$  NMR spectra were recorded on a Mercury-600BB spectrometer at 150 MHz. Chemical shifts are reported in ppm downfield from tetramethylsilane (TMS,  $\delta$  scale with solvent resonances as internal standards). Mass spectra were performed on a Bruker Esquire 3000 plus mass spectrometer (Bruker-FranzenAnalytik GmbH Bremen, Germany) equipped with ESI interface and ion trap analyzer. The X-ray diffraction analysis (XRD) was performed in a transmission mode with a Rigaku RINT2000 diffractometer equipped with graphite monochromated CuK $\alpha$  radiation ( $\lambda = 1.54073 \text{ \AA}$ ). The morphologies and sizes of the xerogels were characterized using field emission scanning electron microscopy (FE-SEM, JSM-6701F) at an accelerating voltage of 8 kV.

## 2. Synthesis of bispillar[5]arene TP5

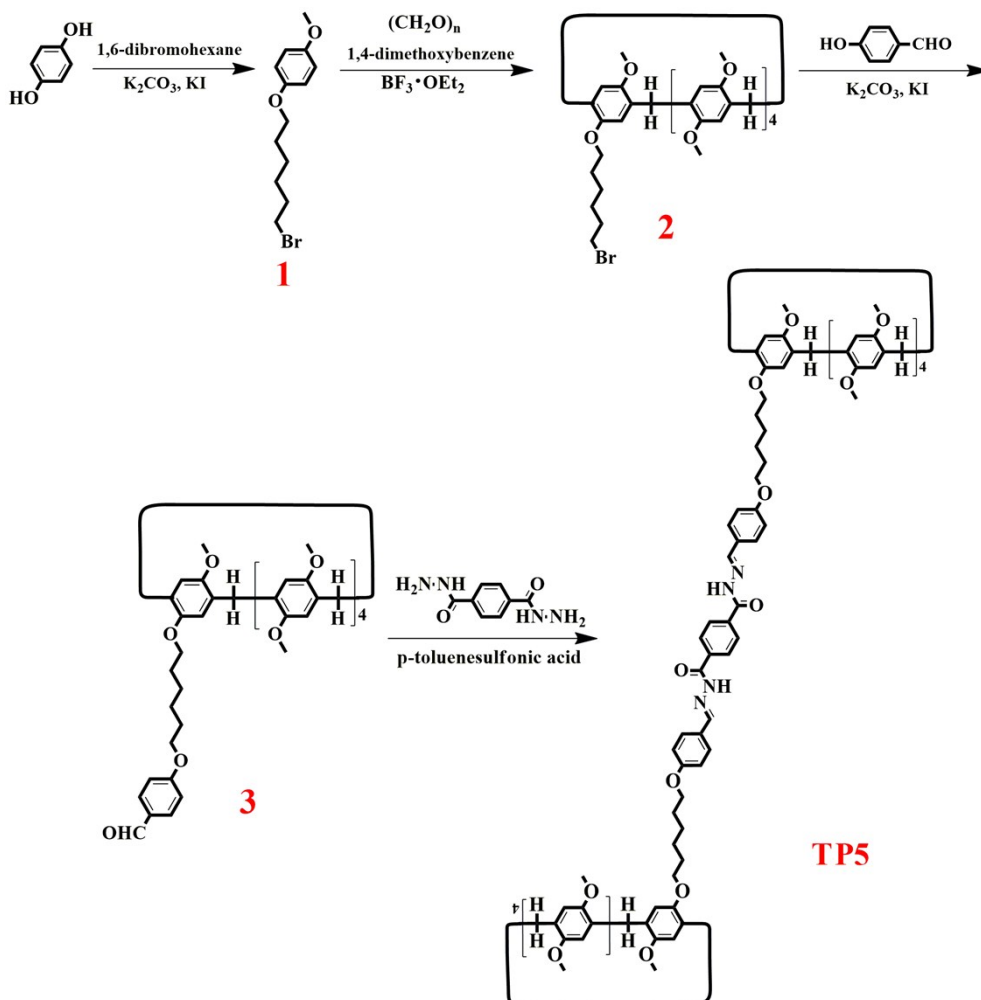

**Scheme S1** Synthesis of bispillar[5]arene **TP5**.

**Synthesis of compound 1:** In a 500 mL round-bottom flask, 4-Methoxyphenol (2.48 g, 20.0 mmol),  $K_2CO_3$  (8.4 g, 60 mmol), KI (3.3 g, 20mmol), 1,6-dibromohexane (12.2 g, 50 mmol) and acetone (400.0 mL) were added. The reaction mixture was stirred at reflux for 2 days. After the solid was filtered off, the solvent was evaporated and the residue was dissolved in  $CH_2Cl_2$ . Column chromatography (silica gel; petroleum ether : ethyl acetate=20:1) afforded a white solid (4.46 g, 78%).  $^1H$  NMR (600 MHz,  $DMSO-d_6$ )  $\delta$  6.82 (s, 4H), 3.86 (s, 2H), 3.67 (s, 3H), 3.52 (s, 2H), 1.88–1.71 (m, 2H), 1.71–1.62 (m, 2H), 1.54–1.30 (m, 4H).

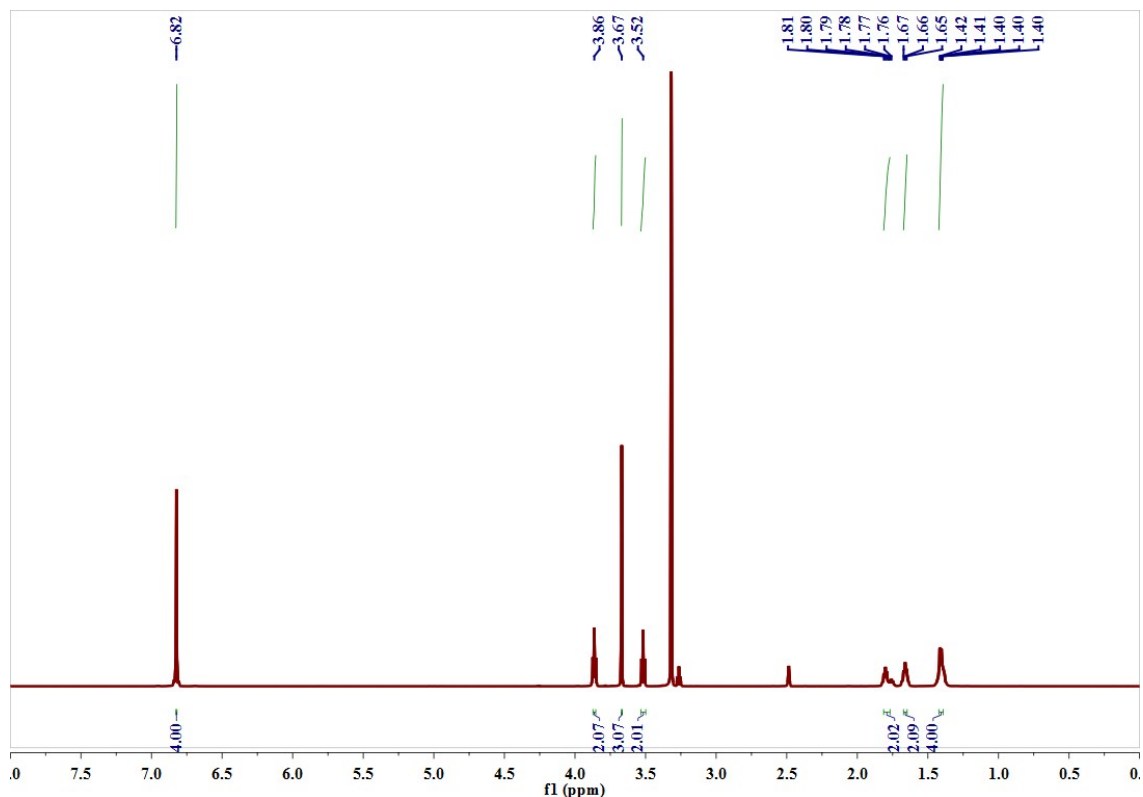

**Fig. S1**  $^1\text{H}$  NMR spectra (600 MHz,  $\text{DMSO-}d_6$ ) of compound **1**.

**Synthesis of a copillar[5]arene **2**:** To a solution of compound **1** (1.43 g, 5.0 mmol) and 1,4-dimethoxybenzene (2.76 g, 20.0 mmol) in 1,2-dichloroethane (80 mL), paraformaldehyde (0.75 g, 25.0 mmol) was added under nitrogen atmosphere. Then boron trifluoride diethyl etherate (6.75 mL, 25 mmol) was added to the solution and the mixture was stirred at room temperature for 2 h and concentrated by rotary evaporation. The resultant oil was dissolved in  $\text{CH}_2\text{Cl}_2$  and washed twice with  $\text{H}_2\text{O}$ . The organic layer was dried over anhydrous  $\text{Na}_2\text{SO}_4$  and evaporated to afford the crude product, which was isolated by flash column chromatography using petroleum ether/ethyl acetate (20 : 1, v/v) to give **2** (1.3 g, 29%) as a white solid.  $^1\text{H}$  NMR (600 MHz,  $\text{CDCl}_3$ )  $\delta$  6.96–6.79(m, 10H), 3.78(t,  $J=10.7\text{Hz}$ , 37H), 3.70(d,  $J=7.0\text{Hz}$ , 6H), 1.54–1.46(m, 2H), 1.26(s, 2H), 0.88(d,  $J=7.0\text{Hz}$ , 2H).  $^{13}\text{C}$  NMR (151 MHz,  $\text{CDCl}_3$ )  $\delta$  150.64(s), 128.07(s), 113.98(s), 55.62(s), 29.57(s). ESI-MS  $m/z$ :  $(\text{M}+\text{H})^+$  Calcd for  $\text{C}_{50}\text{H}_{60}\text{O}_{10}\text{Br}$  900.9; Found 901.1.

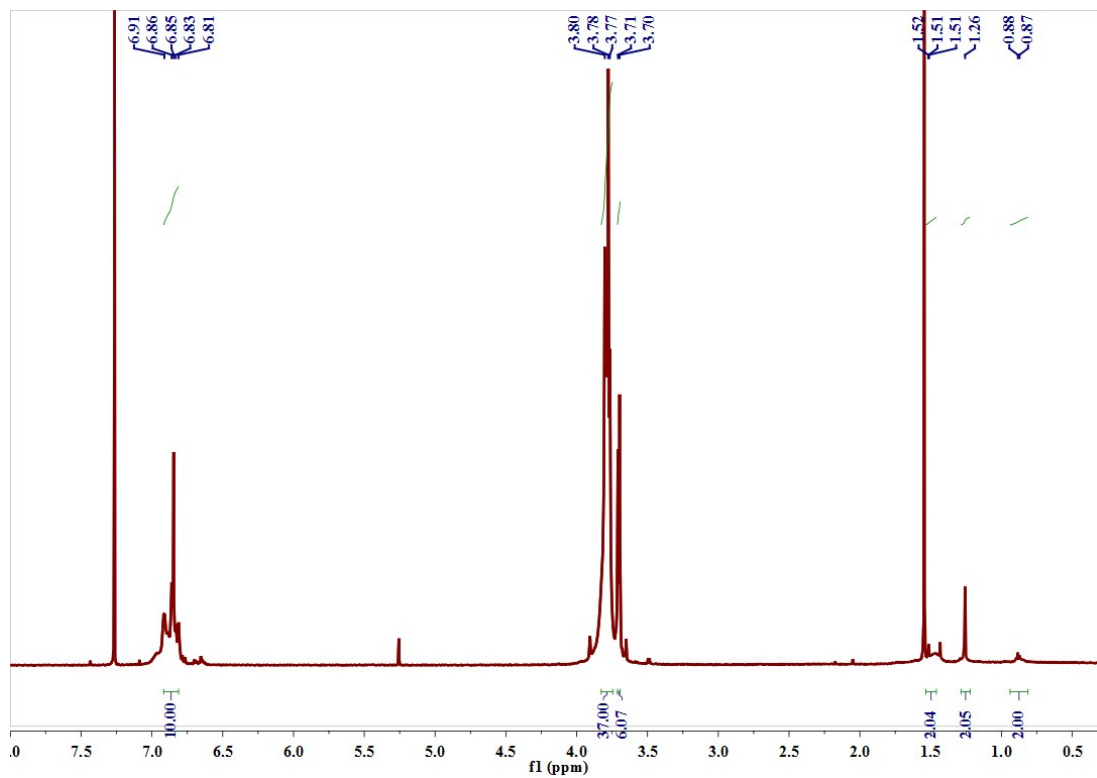

**Fig. S2**  $^1\text{H}$  NMR spectra(600 MHz,  $\text{CDCl}_3$ ) of a copillar[5]arene **2**.

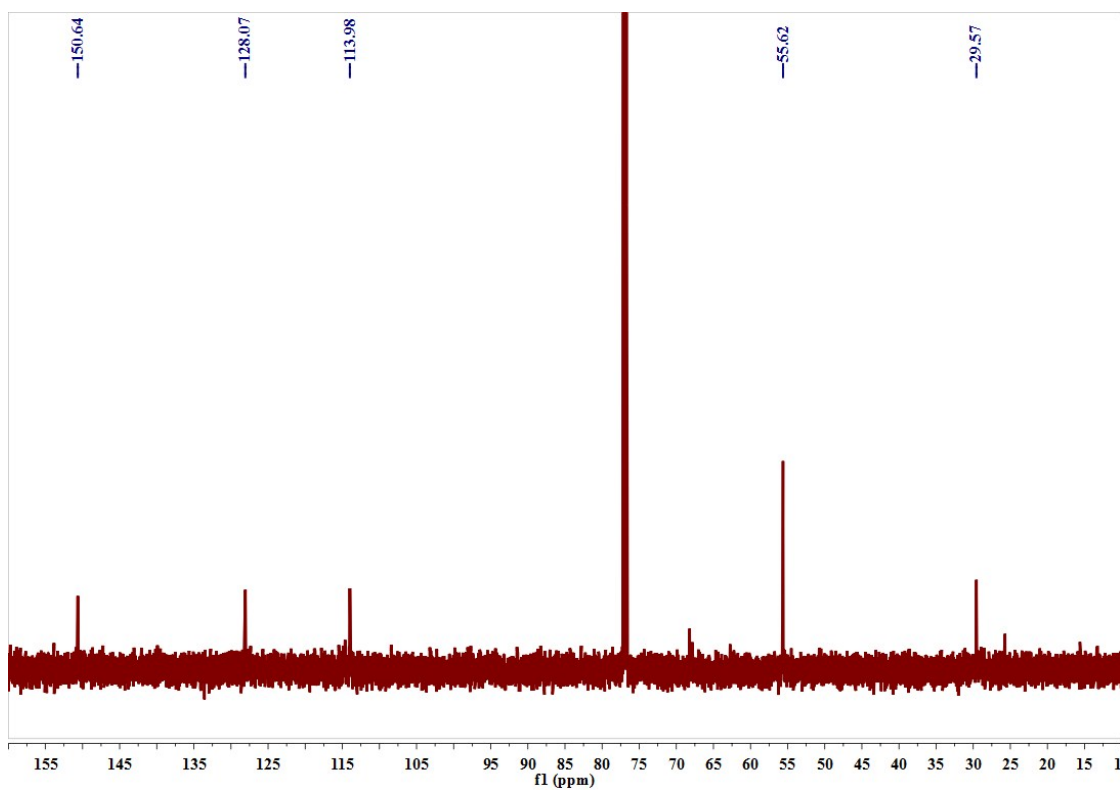

**Fig. S3**  $^{13}\text{C}$  NMR spectra(151 MHz,  $\text{CDCl}_3$ ) of a copillar[5]arene **2**.

## Generic Display Report

### Analysis Info

Analysis Name D:\Data\YANGY\New\CHENJINFA160427\_1.d  
Method tune\_high\_20140922.m  
Sample Name CHENJINFA160427\_1  
Comment

Acquisition Date 4/27/2016 5:35:49 PM

Operator LZU  
Instrument micrOTOF

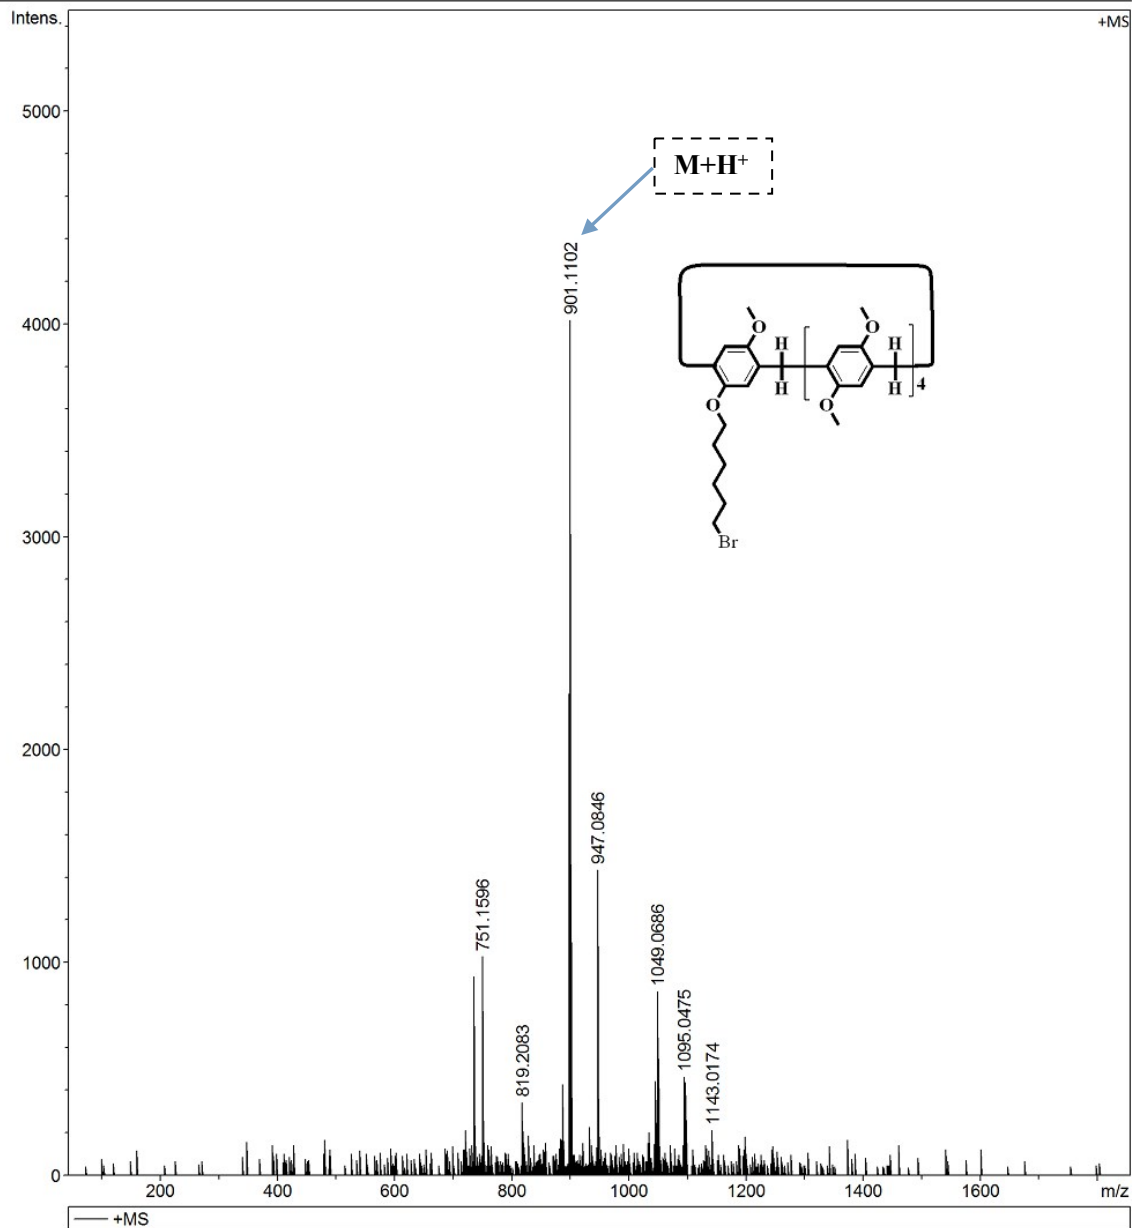

Bruker Compass DataAnalysis 4.1

printed: 4/27/2016 5:36:31 PM

by: LZU

Page 1 of 1

**Fig. S4** mass data of a copillar[5]arene **2**.

**Synthesis of compound intermediate 3:** Copillar[5]arene **2** (0.9 g ,1mmol), and 4-Hydroxybenzaldehyde (0.122g , 1mmol) was dissolved in THF (80

mL).  $K_2CO_3$  (0.138 g, 1mmol) was added and the reaction mixture was stirred at reflux for 2 days. After solvent was evaporated and the residue was dissolved in  $CH_2Cl_2$ . Column chromatography (silica gel; petroleum ether : ethyl acetate=20:1) afforded a white solid (0.42 g, 45%).  $^1H$  NMR (600 MHz,  $CDCl_3$ )  $\delta$  9.88(s, 1H), 7.82(d,  $J=8.5$ Hz, 2H), 6.94(d,  $J=8.6$ Hz, 2H), 6.77(d,  $J=9.7$ Hz, 10H), 3.87(s, 4H), 3.77(s, 10H), 3.65(d,  $J=7.1$ Hz, 27H), 3.60(s, 4H), 1.76(s, 2H), 1.25(s, 2H).  $^{13}C$  NMR (151 MHz,  $CDCl_3$ )  $\delta$  128.21 (s), 114.71 (s), 114.05 (s), 55.74 (s), 29.64 (s). ESI-MS  $m/z$ :  $(M+NH_4)^+$  Calcd for  $C_{57}H_{68}O_{12}N$  958.4736; Found 958.4744.

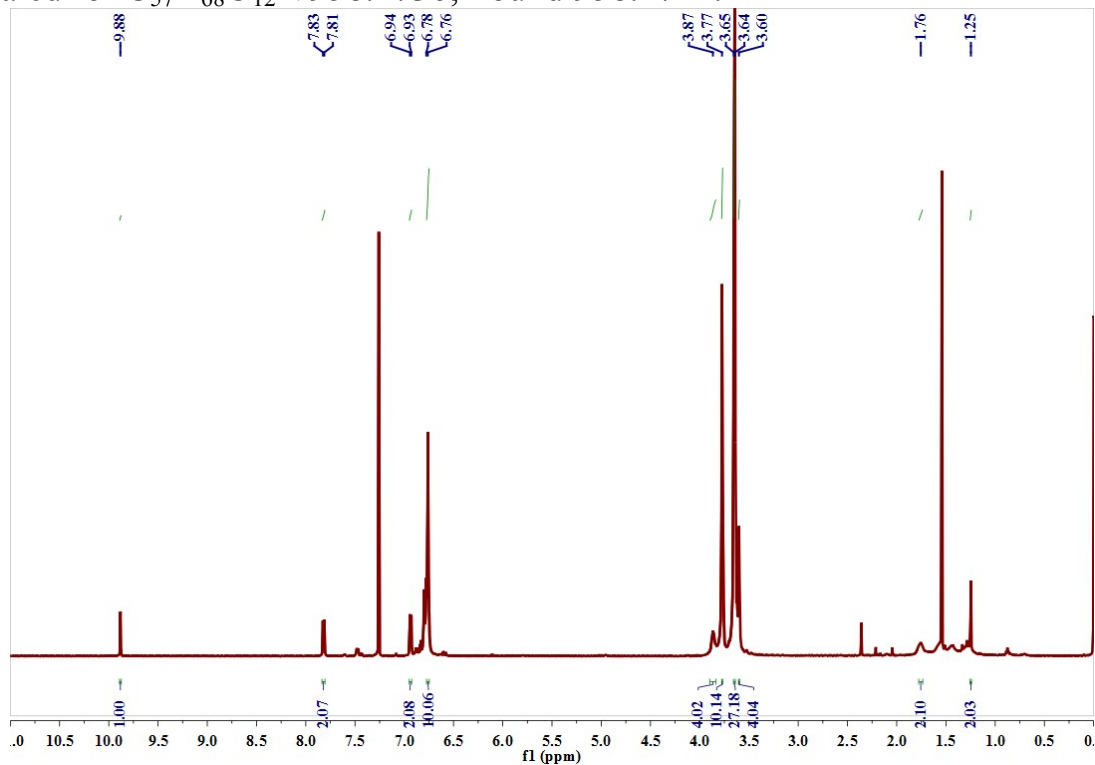

**Fig. S5**  $^1H$  NMR spectra(600 MHz,  $CDCl_3$ ) of compound intermediate **3**.

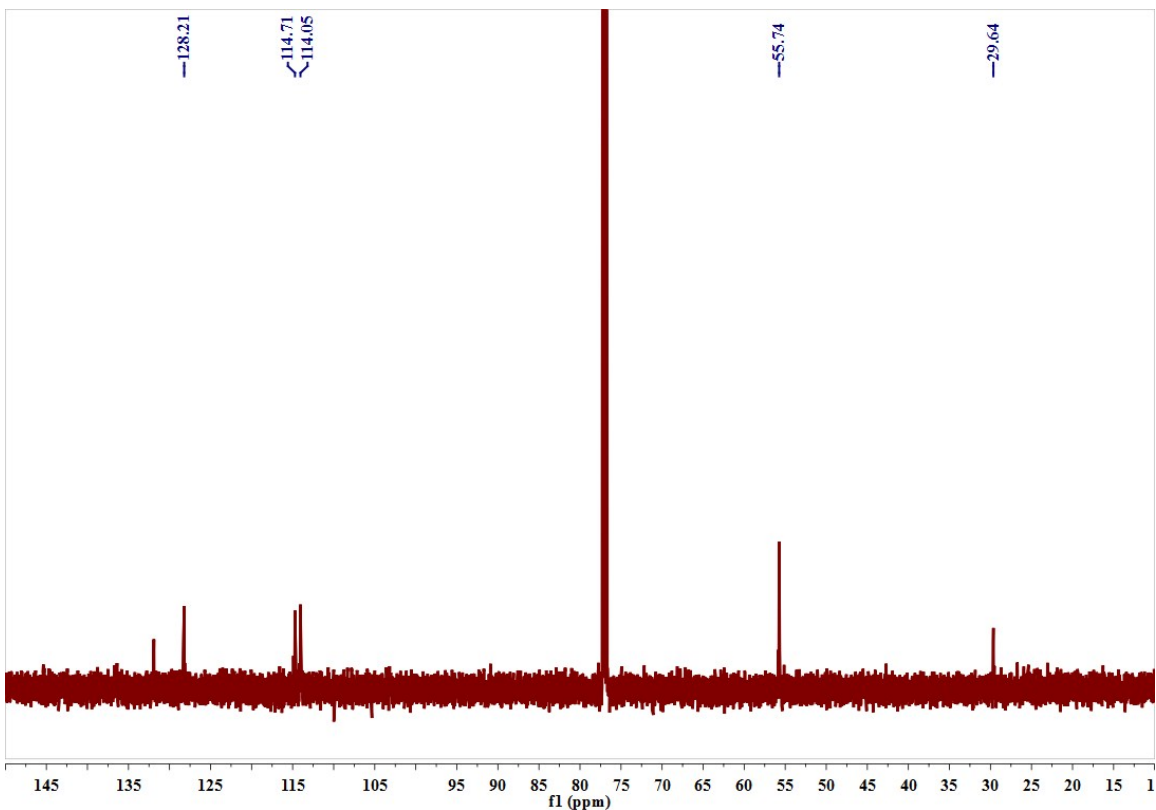

**Fig. S6**  $^{13}\text{C}$  NMR spectra(151 MHz,  $\text{CDCl}_3$ ) of compound intermediate **3**.

D:\Users\data\chenjingfa-1\_160525103118

5/25/2016 11:04:07 AM  
Error=0.8 ppm

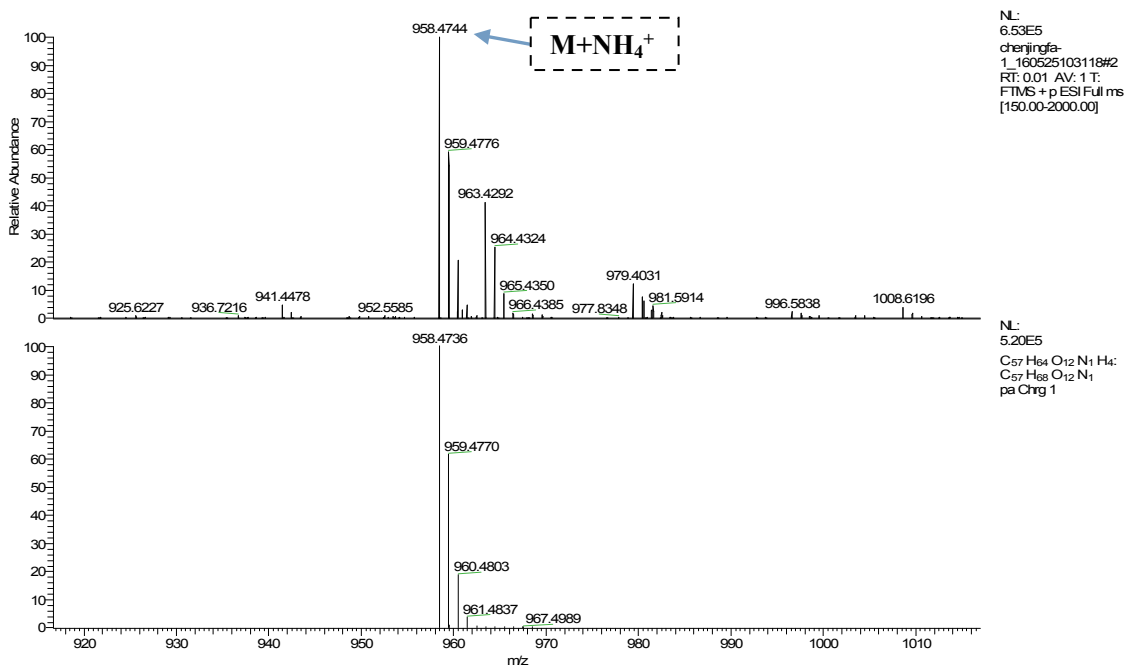

**Fig. S7** High resolution mass data of compound intermediate **3**.



**Synthesis of bispillar[5]arene TP5:** Compound intermediate **3** (1.5 mmol), terephthalic dihydrazide (0.5 mmol) and p-toluenesulfonic acid (0.05 mmol, as a catalyst) were added to ethanol (50 mL) and chloroform (10 mL). Then the reaction mixture was stirred under refluxed conditions for 24 hours, after the solvent was evaporated and the residue was dissolved in CH<sub>2</sub>Cl<sub>2</sub>. Column chromatography (silica gel; petroleum ether : ethyl acetate=1:1) afforded a slightly yellow solid (0.97 g, 95%). <sup>1</sup>H NMR (600 MHz, CDCl<sub>3</sub>) δ 8.29(d, J=63.0Hz, 2H), 8.03(d, J=45.1Hz, 2H), 7.75(d, J=35.0Hz, 6H), 7.51(d, J=15.5Hz, 2H), 6.87(s, 4H), 6.77(dd, J=14.4, 7.6Hz, 20H), 3.87(d, J=6.2Hz, 8H), 3.77(d, J=6.0Hz, 20H), 3.63(dd, J=14.5, 4.9Hz, 54H), 1.81–1.76(m, 4H), 1.70(d, J=6.6Hz, 4H), 1.54–1.50(m, 4H), 1.43(s, 4H). <sup>13</sup>C NMR (151 MHz, CDCl<sub>3</sub>) δ 150.70(s), 128.14(s), 114.07(s), 111.38–109.26 (m), 68.62–67.16(m), 55.71(s), 29.67(s), 25.81(s). ESI-MS m/z: (M+H)<sup>+</sup> Calcd for C<sub>122</sub>H<sub>135</sub>O<sub>24</sub>N<sub>4</sub> 2040.9494; Found 2040.9457.

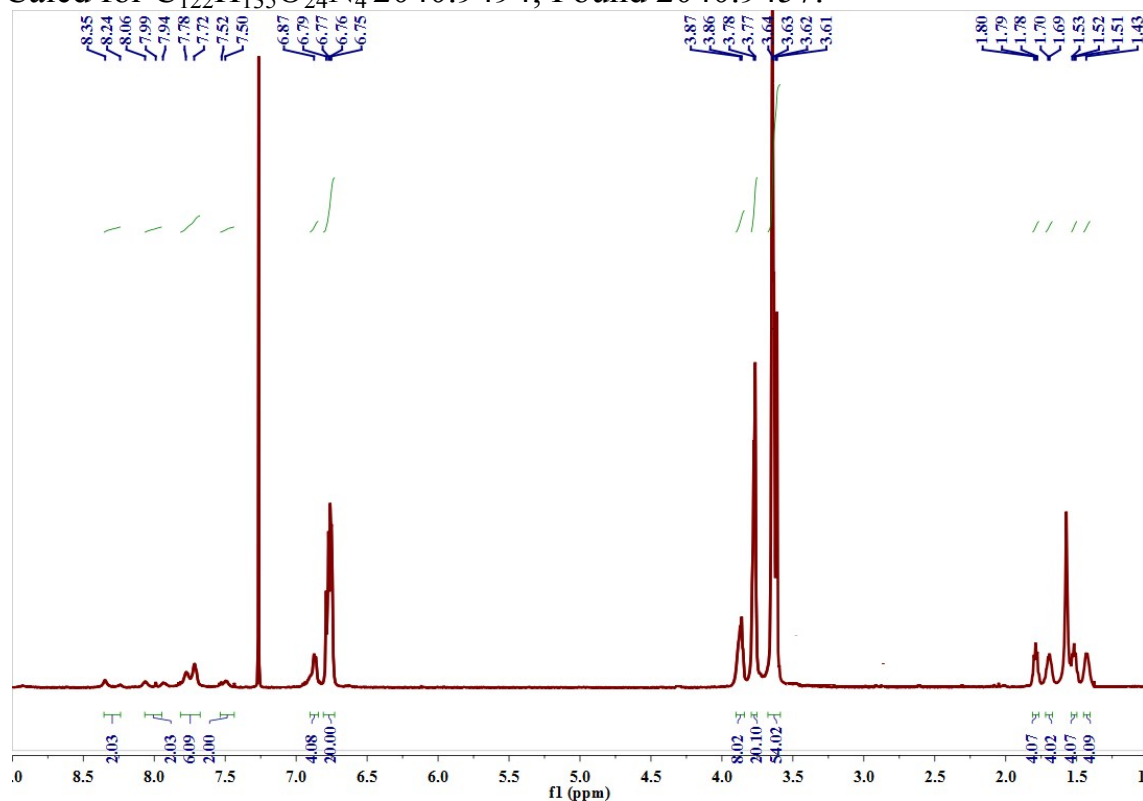

**Fig. S8** <sup>1</sup>H NMR spectra(600 MHz, CDCl<sub>3</sub>) of bispillar[5]arene **TP5**.

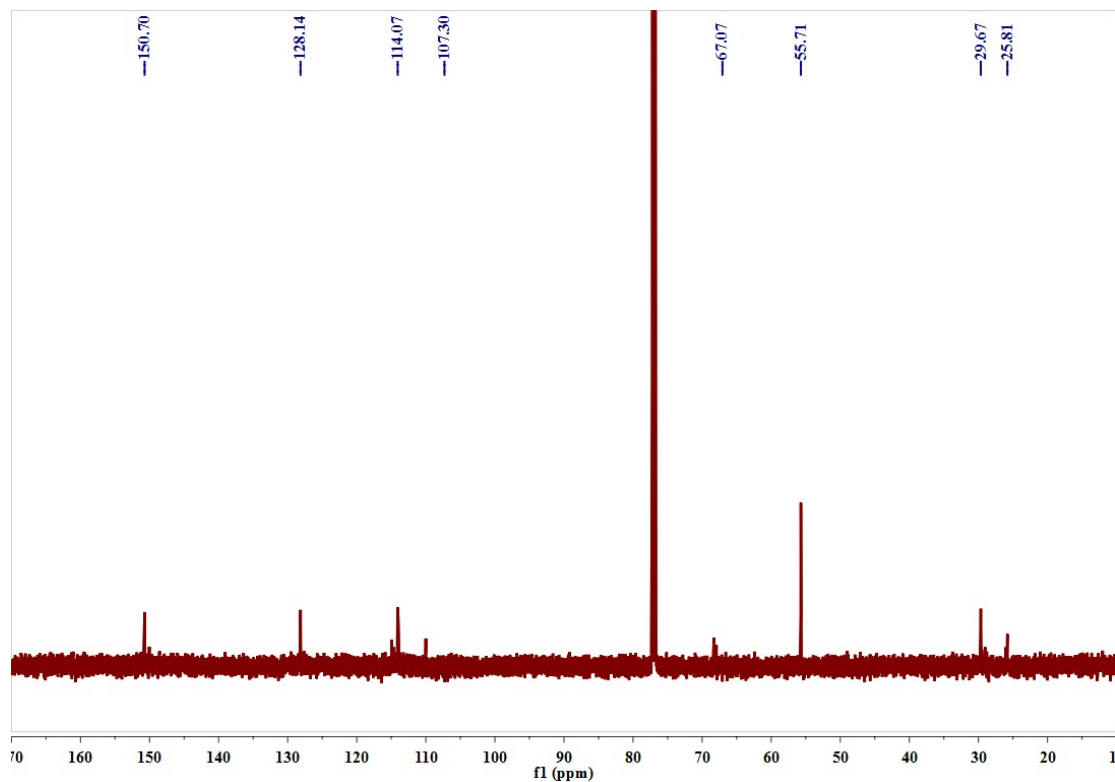

**Fig. S9**  $^{13}\text{C}$  NMR spectra(151 MHz,  $\text{CDCl}_3$ ) of bispillar[5]arene **TP5**.

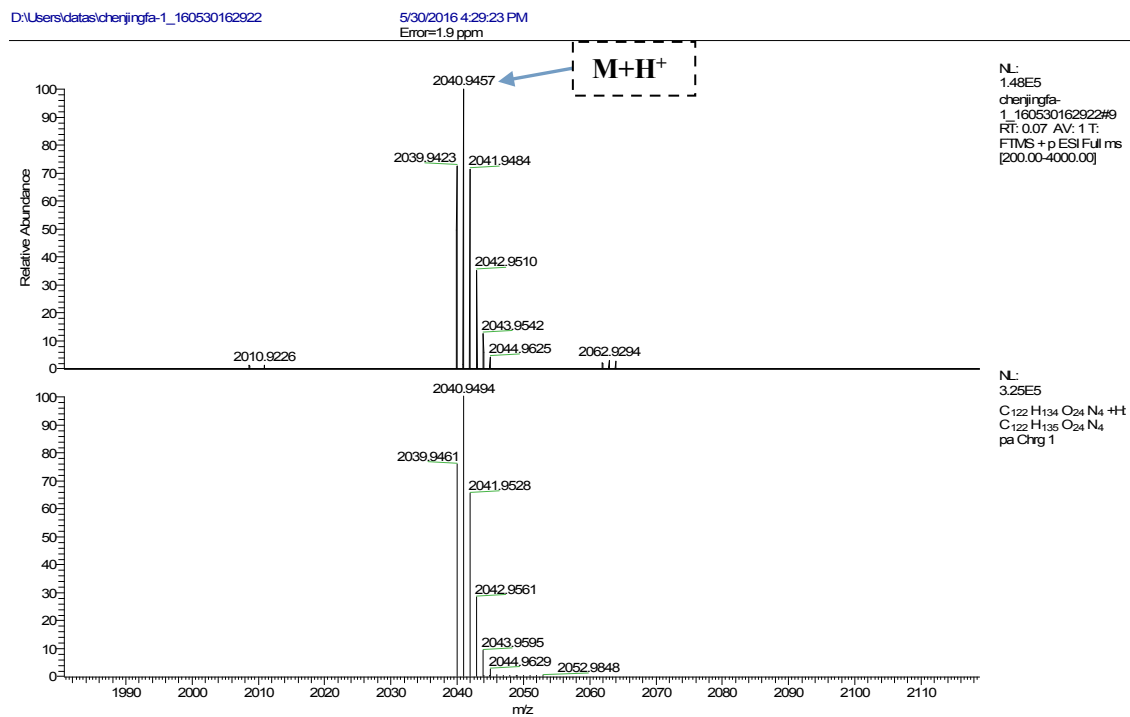

**Fig. S10** High resolution mass data of bispillar[5]arene **TP5**.

### 3. Synthesis of G

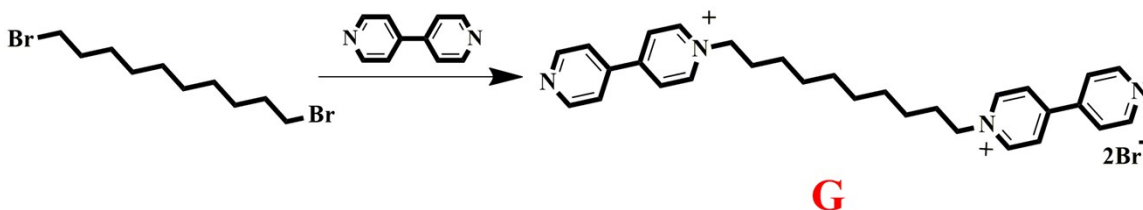

#### Scheme S2 Synthesis of G.

**Synthesis of compound G:** A solution of 1,10-dibromodecane (1.89 g, 6.3 mmol) in CH<sub>3</sub>CN (30 mL) was added dropwise into a stirred solution of 4,4'-bipyridine (5.56 g, 35.7 mmol) in CH<sub>3</sub>CN (50 mL) and refluxed over night. After it cooled, the suspension was filtered. The solid was washed with CH<sub>3</sub>CN and then dried in an oven to afford a pale green solid **G** (3.3 g, 86%).  
<sup>1</sup>H NMR (600 MHz, D<sub>2</sub>O) δ 8.81(t, J=7.0Hz, 4H), 8.62(d, J=1.4Hz, 4H), 8.25(s, 4H), 7.76(d, J=1.5Hz, 4H), 4.50(d, J=7.3Hz, 4H), 1.90(d, J=6.8Hz, 4H), 1.17(d, J=38.2Hz, 12H).

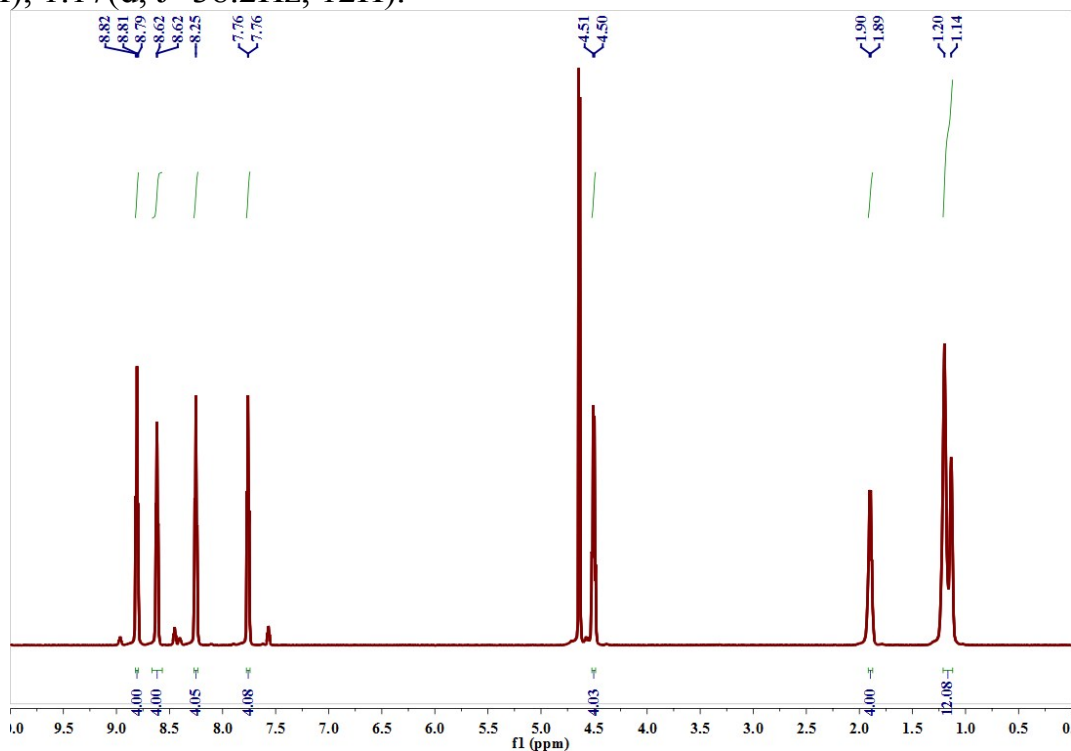

**Fig. S11** <sup>1</sup>H NMR spectra(600 MHz, D<sub>2</sub>O) of **G**.

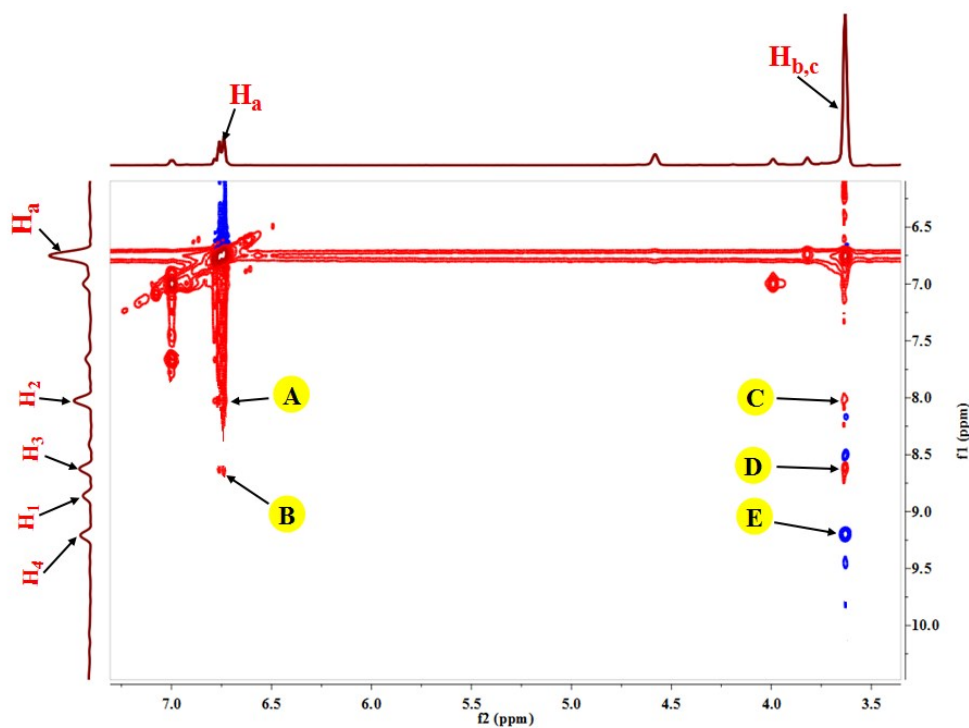

**Fig. S12** 2D NOESY NMR spectrum (600 MHz, 298 K) of 2.0 mM TP5 and G in DMSO- $d_6$  solution.

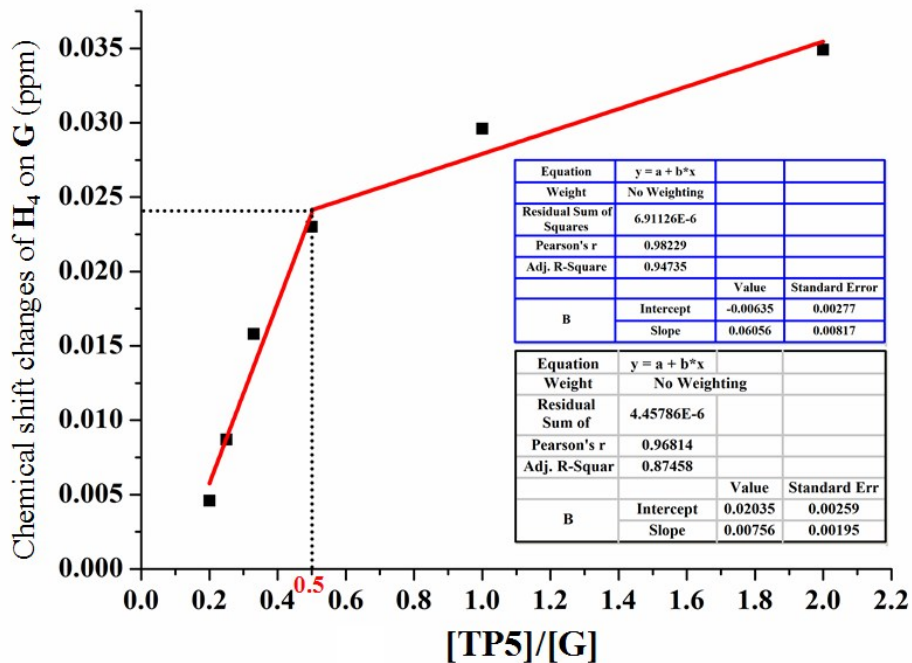

**Fig. S13** a mole ratio plot for the complexation between TP5 and G, indicating a 1:2 stoichiometry.

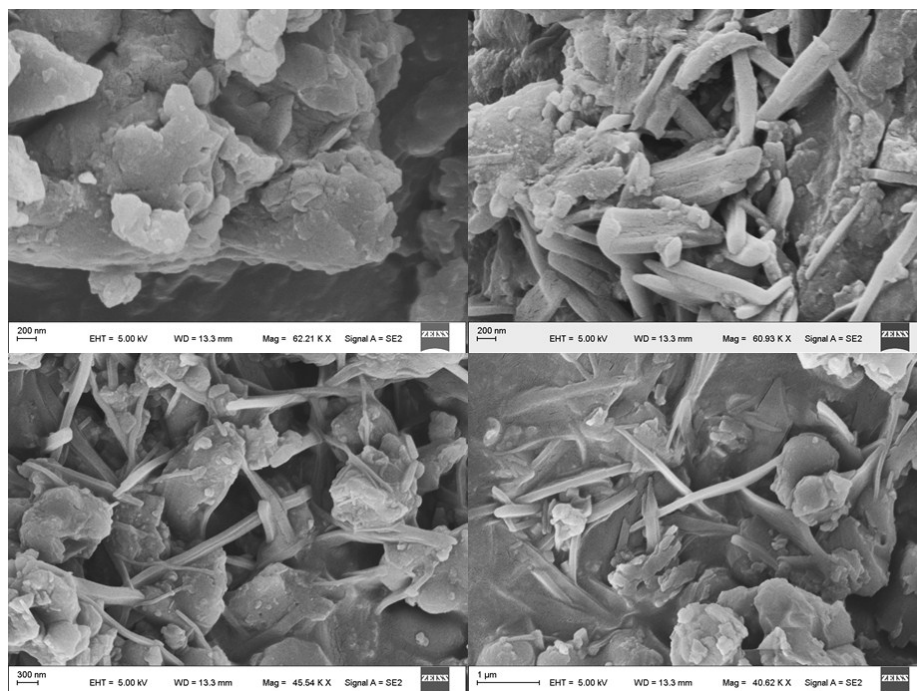

**Fig. S14** SEM images of TP5·G gel.

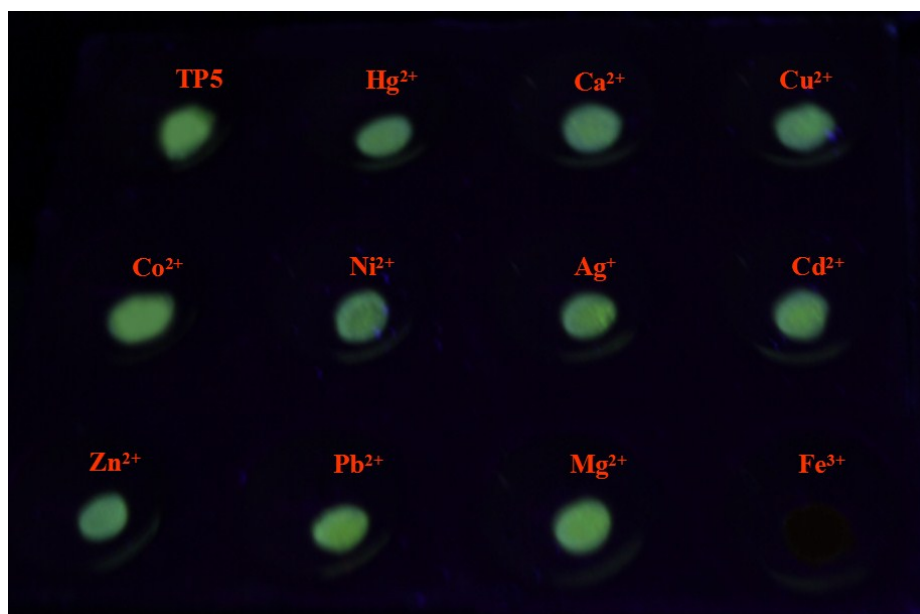

**Fig. S15** Fluorescence responses of the supramolecular gel to the presence of various cations.

#### **Determination of the detection limit**

We use the  $3\delta$  way to figure out the detection limit. The process of the analysis as follows.

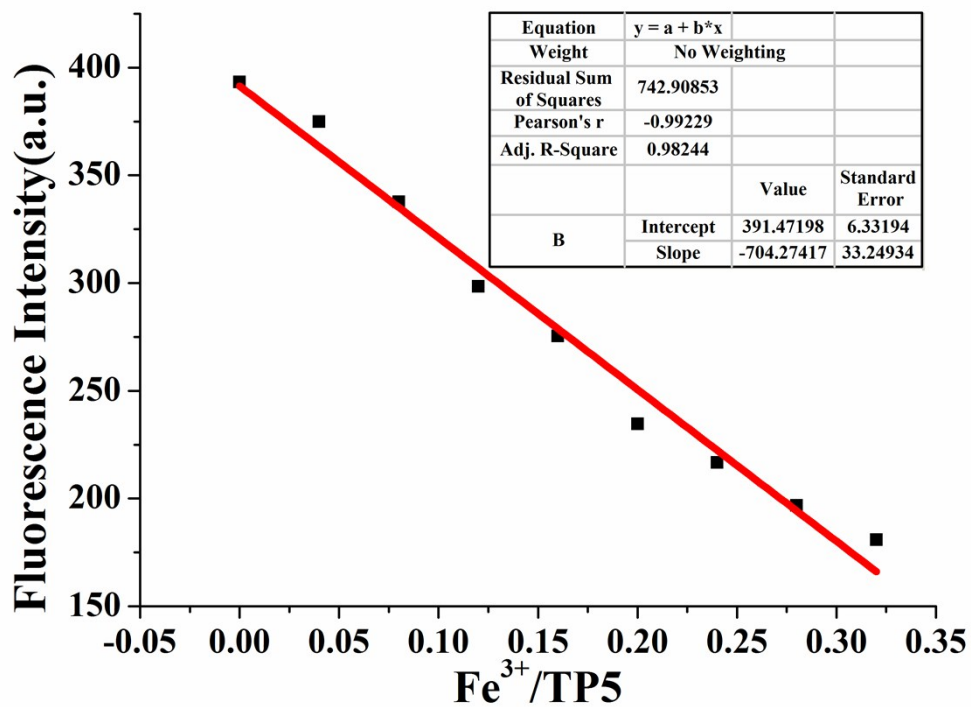

**Fig. S16** The photograph of the linear range.

Linear Equation:  $Y = -704.27417X + 319.47198$   $R^2 = 0.98244$

$S = 704.27 \times 10^6$

$$\delta = \sqrt{\frac{\sum(x_i - \bar{x})^2}{n-1}} = 36.51 (n = 20)$$

$K = 3$

$LOD = K \times \delta / S = 1.56 \times 10^{-7} M$

---

\* Corresponding author. Tel: +86 931 7970394.

E-mail address: [weitaibao@126.com](mailto:weitaibao@126.com).
